# Microbial GWAS studies revealing combinations of Omicron RBD mutations existed and may contribute to antibody evasion and ACE2 binding

Xumin Ou<sup>1,2,3</sup>, Zhishuang Yang<sup>1,3,4</sup>, Dekang Zhu<sup>1,3</sup>, Sai Mao<sup>1,3,4</sup>, Mingshu Wang<sup>1,3,4</sup>, Renyong Jia<sup>1,3,4</sup>, Shun Chen<sup>1,3,4</sup>, Mafeng Liu<sup>1,3,4</sup>, Qiao Yang<sup>1,3,4</sup>, Ying Wu<sup>1,3,4</sup>, Xinxin Zhao<sup>1,3,4</sup>, Shaqiu Zhang<sup>1,3,4</sup>, Juan Huang<sup>1,3,4</sup>, Qun Gao<sup>1,3,4</sup>, Yunya Liu<sup>1,3,4</sup>, Ling Zhang<sup>1,3,4</sup>, Maikel Peoplenbosch<sup>2</sup>, Qiuwei Pan<sup>2</sup>, Anchun Cheng<sup>1,3,4\*</sup>.

1Institute of Preventive Veterinary Medicine, Sichuan Agricultural University, Wenjiang, Chengdu, Sichuan, China

2Department of Gastroenterology and Hepatology, Erasmus MC - University Medical Center Rotterdam, PO Box 2040, NL-3000 CA Rotterdam, The Netherlands

3Key Laboratory of Animal Disease and Human Health of Sichuan Province, Sichuan Agricultural University, Wenjiang, Chengdu, Sichuan, China

4Research Center of Avian Disease, College of Veterinary Medicine, Sichuan Agricultural University, Wenjiang, Chengdu, Sichuan, China

\* Anchun Cheng.

**Email:** chenganchun@vip.163.com

**Author Contributions:** X.O., Q.P. and A.C. devised the project and the main conceptual ideas; X.O., Z.Y., D.Z., S.M. and M.W. acquired data; X.O. and Z.Y. designed and performed the computations; X.O., Z.Y., D.Z., S.M., R.J., S.C., M.L. and Q.Y. analyzed and interpreted data; X.O. and Z.Y. drafted the manuscript; Y.W., X.Z., S.Z., J.H., Q.G., Y.L., L.Z., M.P. and Q.P. proofread the draft; all authors approved the final version of the manuscript.

**Competing Interest Statement:** The authors declare no conflict of interest.

**Classification:** Virus evolution, geographic transmission.

**Keywords:** Omicron variant; RBD substitutions; antibody evasion; ACE binding.

**This file includes:**

Main Text

1

1

2 **Abstract**

3 Since Omicron variant of SARS-CoV-2 was first detected in South Africa (SA), it has now  
4 dominated in United Kingdom (UK) of Europe and United State (USA) of North America. A  
5 prominent feature of this variant is the gathering of spike protein mutations, in particularly at the  
6 receptor binding domain (RBD). These RBD mutations essentially contribute to antibody  
7 resistance of current immune approaches. During global spillover, combinations of RBD  
8 mutations may exist and synergistically contribute to antibody resistance in fact. Using three  
9 geographic-stratified genome wide association studies (GWAS), we observed that RBD  
10 combinations exhibited a geographic pattern and genetical associated, such as five common  
11 mutations in both UK and USA Omicron, six or two specific mutations in UK or USA Omicron.  
12 Although the UK specific RBD mutations can be further classified into two separated sub-groups  
13 of combination based on linkage disequilibrium analysis. Functional analysis indicated that the  
14 common RBD combinations (fold change, -11.59) alongside UK or USA specific mutations  
15 significantly reduced neutralization (fold change, -38.72, -18.11). As RBD overlaps with  
16 angiotensin converting enzyme 2(ACE2) binding motif, protein-protein contact analysis indicated  
17 that the common RBD mutations enhanced ACE2 binding accessibility and were further  
18 strengthened by UK or USA-specific RBD mutations. Spatiotemporal evolution analysis indicated  
19 that UK-specific RBD mutations largely contribute to global spillover. Collectively, we have  
20 provided genetic evidence of RBD combinations and estimated their effects on antibody evasion  
21 and ACE2 binding accessibility.

22

## 23 **Main Text**

### 24 **Introduction**

25 The Omicron variant of SARS-CoV-2 was recently detected in southern Africa, and has now  
26 sparked a new wave of global epidemic, in particular Europe and North America. A notable  
27 feature of this variant is the large amount of RBD mutations on spike protein (1). One of  
28 fundamental impacts of these mutations is antibody resistance (so called antibody evasion) (2).  
29 Because neutralization by clinically used monoclonal antibodies or serum of post COVID-19  
30 vaccination is completely or incompletely diminished (3). This has been confirmed by evaluating  
31 neutralizing activity of 17 commercial antibodies to spike protein or pseudo-virus with differently  
32 individual RBD mutation (3). As a receptor docking domain of spike protein, these mutations may  
33 also change viral entry via regulating binding affinity to ACE2 receptor (4). Thus, the RBD  
34 mutations not only participate in antibody evasion but also ACE2 binding activity.

35 However, the RBD mutations may collaboratively contribute to antibody evasion, in a form of  
36 RBD combination or an epitope but not individual mutation. To address this question, we aimed  
37 to know if combinations of RBD mutations of Omicron variant exist and how they contribute to  
38 antibody evasion and ACE2 binding activity. In order to further understand the trend of its current  
39 global transmission, spatiotemporal evolution of Omicron harboring different RBD combinations  
40 will be studied.

41

### 42 **Results**

43

#### 44 **Different combinations of RBD mutations existed in United Kingdom and United state** 45 **Omicron**

46 As of 2-Jan-2022, we retrieved 77123 sequences of Omicron variant from GASID database.  
47 This variant was highly distributed in Africa, Europe and North America, in particular south Africa  
48 (SA) (72.94%, 1383/1896), United Kingdom (UK) (77.91%, 39849/51144) and United State (USA)  
49 (95.88%,19534/20374) (Fig.1A). To understand if geographic combinations of RBD mutations  
50 existed, three microbial-Genome wide association studies (GWASs) and linkage disequilibrium  
51 (LD) analysis were conducted between SA, UK and USA (5). Comparing with the SA Omicron,  
52 we observed that S477N, T478K, E484A, Q493R and G496S were significantly enriched in both  
53 USA and UK Omicron, and defined as common RBD mutations in this context (Fig.1B). However,  
54 the percentage of enrichment of these mutations in USA Omicron is much lower than that of UK  
55 Omicron. Meta-analysis of three GWAS studies showed that S371L, S373P, S375F, Q498R,  
56 N501Y and N505H were specifically enriched in UK Omicron, and G446S and N440K specifically  
57 in USA Omicron (Fig.1C-D). In addition, genetic association analysis indicated that common  
58 increased RBD mutations alongside with UK or USA specific RBD mutations were genetically  
59 linked or concurrently existed in Omicron variants (Fig.1E and Dataset).

60

#### 61 **Specific RBD combinations enhanced antibody evasion and ACE2 binding accessibility**

62 Supporting antibody evasion, recent evidence showed that the effect of individual RBD  
63 mutation to neutralization was largely diminished. However, the position adjacent RBD mutations  
64 may in fact synergistically contribute to antibody evasion. Here, we re-evaluate the synergistic  
65 effect of common and geographically specific RBD combinations on antibody evasion. Using the  
66 data of neutralization by 17 commercial monoclonal antibodies to single RBD mutation, we  
67 observed synergistic effects of common RBD combinations on antibody resistance  
68 (Mean+95%CI, -11.59 (-7.1, -13.7)) (Fig.1F). In addition, UK-specific mutations plus the common  
69 mutations significantly enhanced antibody evasion from -25.89 to -38.72 (p=0.0003). These USA-  
70 specific mutations plus the common mutations also enhanced antibody evasion from -6.53 to -  
71 18.11 (p=0.0006).

72 Another profound impact of RBD combinations is ACE2 binding accessibility. Exploiting the  
73 recent released crystallography of spike protein and ACE2 complex, we evaluated RBD-ACE2  
74 contact accessibility by mutagenesis (4) (Fig.1H). We primarily found that common RBD  
75 mutations with either UK-specific RBD mutations or USA-specific mutations largely increased  
76 ACE2 binding accessibility (Fig. 1I-K).

77

78

## **Spatiotemporal transmission of Omicron variant with different RBD combinations**

79

80

81

82

83

84

85

86

87

88

89

90

91

92

93

94

95

96

97

98

99

### **Discussion**

100

101

102

103

104

105

106

107

108

109

110

111

112

113

114

115

116

117

118

119

120

121

122

123

124

125

126

127

128

129

130

Currently, a large amount of spike protein mutations have been identified in Omicron variant, in which 15 out of 32 mutations located in RBD. As reported, these RBD mutations extensively escape neutralization of both monoclonal antibody or serum post COVID-19 vaccination. There are two mode-of-action of antibody evasion, either in form of single mutation or a combination of RBD mutations. A host of experimental proofs from multiple research centers have confirmed existence of antibody resistance, that is attribute to RBD mutations but in a form of single mutation or unknown combinations. As reported, single RBD mutation like K417N, G446S, E484A, S371L, N440K, G446S, and Q493R confers greater antibody resistance to Omicron variant (2, 3). In fact, the most possible mode-of-antibody resistance is combinations of RBD mutations. Supportively, we have identified that 5 out of 15 RBD mutations concurrently exist in both UK and USA Omicron. However, 6 out of 15 RBD mutations specifically exist in UK Omicron, and 2 RBD mutations in USA Omicron. This evidence indicated that RBD mutations existed in a manner of combination and showed geographical pattern. Compared with single RBD mutation, the RBD combinations largely escape antibody neutralization (fold change, -11.59) and even strengthened by UK or USA specific RBD mutations (fold change, -38.72, -18.11).

As antibody-binding RBD epitope overlaps with ACE2-binding motif. It is also possible that RBD combinations may change ACE2 binding affinity (4). Directed by this knowledge, structural variations of mutated RBD and ACE2 binding complex were analyzed. We overserved that the common RBD combinations enhanced ACE2 binding accessibility and was further enhanced by UK and USA specific RBD substitutions. Collectively, our data suggested that RBD combinations of Omicron existed and showed a patten of geographical combination. Spatiotemporal tracking of Omicron harboring different RBD combinations also showed geographical dominance and crossly transmitted between continents, especially in Europe and North America (6). Importantly, primary evidence from neutralization and ACE2 binding implied that RBD combinations and their geographical combinations largely intensified antibody evasion and enhanced ACE2 binding accessibility. Herein, by exploiting multiple geographical stratified GWAS studies, we have showed genetic evidence of RBD combinations. Despite significance of this knowledge, its biological impacts on antibody evasion and ACE2 binding were evaluated and confirmed by currently available experimental data. This new understanding will pave new avenue to study the exact impact of RBD combinations regarding antibody resistance and ACE2 binding.

131 **Materials and Methods**

132

133 **GWAS study and LD analysis.** The detailed sequencing data and methods are described in SI  
134 Appendix (6).

135

136 **Neutralization activity and ACE2 binding accessibility.** The raw data of neutralization, data  
137 processing and statistic are described in SI Appendix.

138

139 **Data availability.** Raw data and processed CSV files are available at supplementary dataset or  
140 with contacts to corresponding author for details.

141

142 **Acknowledgments**

143 This work was supported by National Natural Science Foundation of China (32102706 to X. Ou),  
144 Sichuan Veterinary Medicine and Drug Innovation Group of China Agricultural Research System  
145 (SCCXTD-2021-18), Science and Technology Program of Sichuan Province (2020YJ0396 to X.  
146 Ou), China Agriculture Research System of MOF and MARA.

147

148 **References**

- 149 1. WHO (2021) Classification of Omicron (B.1.1.529): SARS-CoV-2 Variant of Concern.  
150 2. L. Liu *et al.*, Striking Antibody Evasion Manifested by the Omicron Variant of SARS-CoV-  
151 2. *Nature* 10.1038/s41586-021-04388-0 (2021).  
152 3. D. Planas *et al.*, Considerable escape of SARS-CoV-2 Omicron to antibody  
153 neutralization. *Nature* 10.1038/s41586-021-04389-z (2021).  
154 4. R. H. Yan *et al.*, Structural basis for the recognition of SARS-CoV-2 by full-length human  
155 ACE2. *Science* **367**, 1444-+ (2020).  
156 5. X. Ou *et al.*, Tracing two causative SNPs reveals SARS-CoV-2 transmission in North  
157 America population. *BioRxiv* <https://doi.org/10.1101/2020.05.12.092056> (2020).  
158 6. X. M. Ou *et al.*, Tracing genetic signatures of bat-to-human coronaviruses and early  
159 transmission of North American SARS-CoV-2. *Transbound Emerg Dis*  
160 10.1111/tbed.14148 (2021).

161

162 **Figures**

163

164 **Figure 1. Combinations of RBD mutations and corresponding effects on antibody**  
165 **neutralization and ACE2 binding.** (A) The South Africa (SA) isolates, United Kingdom (UK)  
166 isolates and USA isolates dominated the global population, as of 2-Jan-2022. (B) Commonly  
167 increased but frequency differently RBD mutations identified in UK and USA Omicron variants.  
168 Three geographical stratified GWAS studies (SA>UK, SA>USK and SA>USA) and Linkage  
169 Disequilibrium (LD) analysis were conducted. (C-D) UK and USA-specific RBD mutations. (E)  
170 WHO defined RBD substitutions and GWAS studies identified common, and specific  
171 combinations of RBD substitution in UK and USA Omicron. (F-G) Antibody resistance to 17  
172 commercial mono-antibody was enhanced by combinations of RBD mutations (Mean+95%CI, -  
173 11.59 (-7.1, -13.7)). UK-specific RBD substitutions (from -25.89 (-14.10, -32.5) to -38.72 (-26.70, -  
174 49.80)) further strengthened antibody resistance ( $p < 0.001$ ), as well as USA-specific RBD  
175 combinations (from -6.53 (-0.5, -4.6) to -18.11 (-7.6, -18.4)). Data of antibody neutralization to  
176 single RBD substitution was archived by liu, L. et al. Nature, 2021. Paired T-test was used for  
177 statistical analysis. (H) Wild type of SARS-CoV-2 RBD binds to ACE2 (PDB, 6M17). 15 WHO  
178 label RBD substitutions were displayed. (I-K) The common RBD combinations enhanced ACE2  
179 binding accessibility and further enhanced by UK and USA specific RBD mutations. This analysis  
180 was conducted by Pymol mutagenesis.  
181

182 **Figure 2. Spatiotemporal tracking of global Omicron variants with different RBD**  
183 **combinations.** (A) linkage disequilibrium (LD) analysis indicated that the geographical pattern of  
184 RBD combinations correlated with LD data represented by R square. Of note, the six UK-specific  
185 RBD mutations can be further divided into two sub-groups of RBD combination. (B) Omicron with  
186 different RBD combinations has globally spread and can be well stratified by continents, in  
187 particular Europe and North America. (C) Time-dependent change suggested that global Omicron  
188 can be well classified by different RBD combination during the time of spillover. (D) However, the  
189 Omicron harboring the common, and USA-specific RBD mutations decreased along time, while  
190 the Omicron harboring either two sub-groups of UK-specific RBD mutations increased at the  
191 same period. (E) After 2-Dec-2021, the Omicron harboring USA-specific mutations was  
192 significantly decreased, while the Omicron with UK-specific mutations (UK-371-373-375 RBD  
193 mutations and UK-498-501-505 RBD mutations) was significantly increased. Student T test was  
194 used for statistical analysis. (F-G) Percentage per day of Omicron harboring UK-371-373-375  
195 RBD mutations was positively related to the increased Omicron harboring UK-498-501-505 RBD  
196 mutations ( $R^2=0.9813$ ), but was negatively related to the decreased Omicron harboring USA-  
197 specific RBD mutations ( $R^2=0.9777$ ).

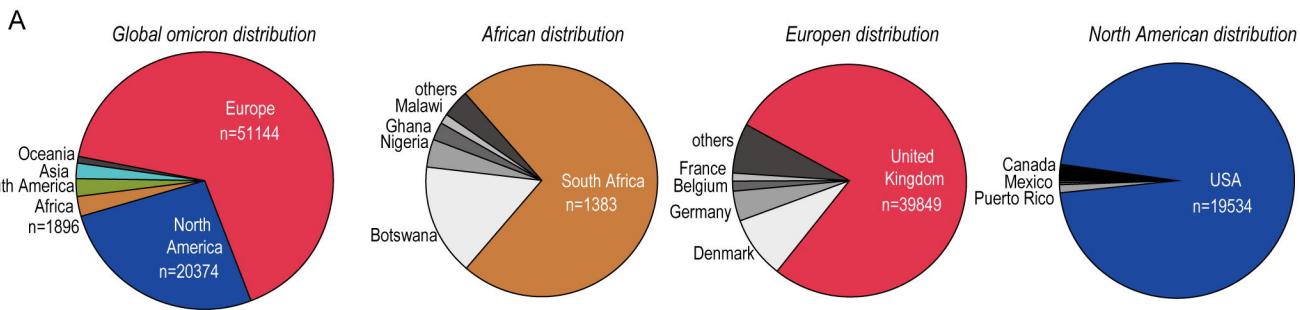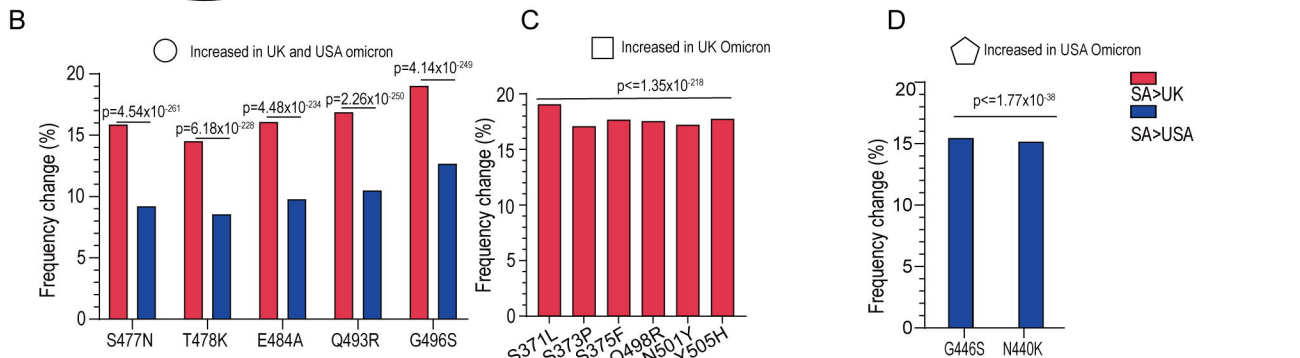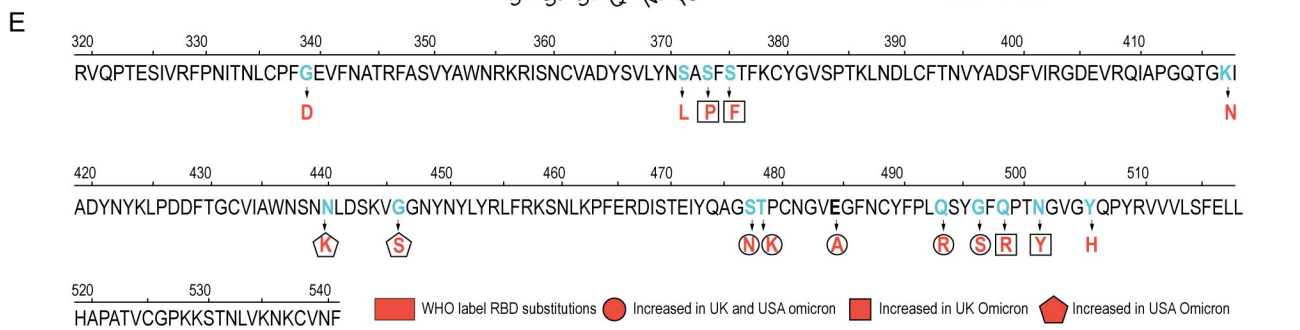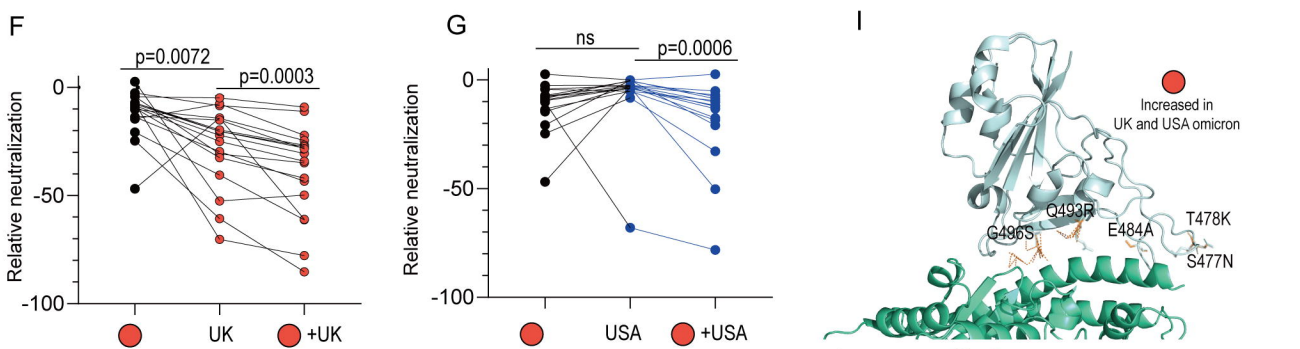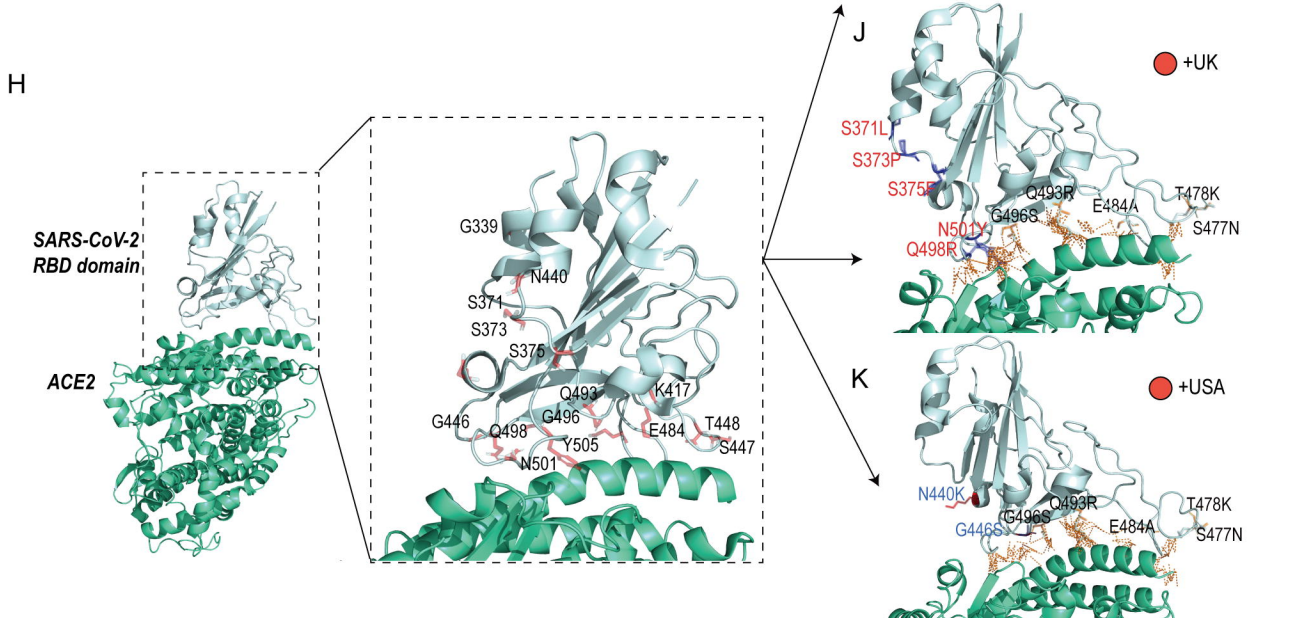

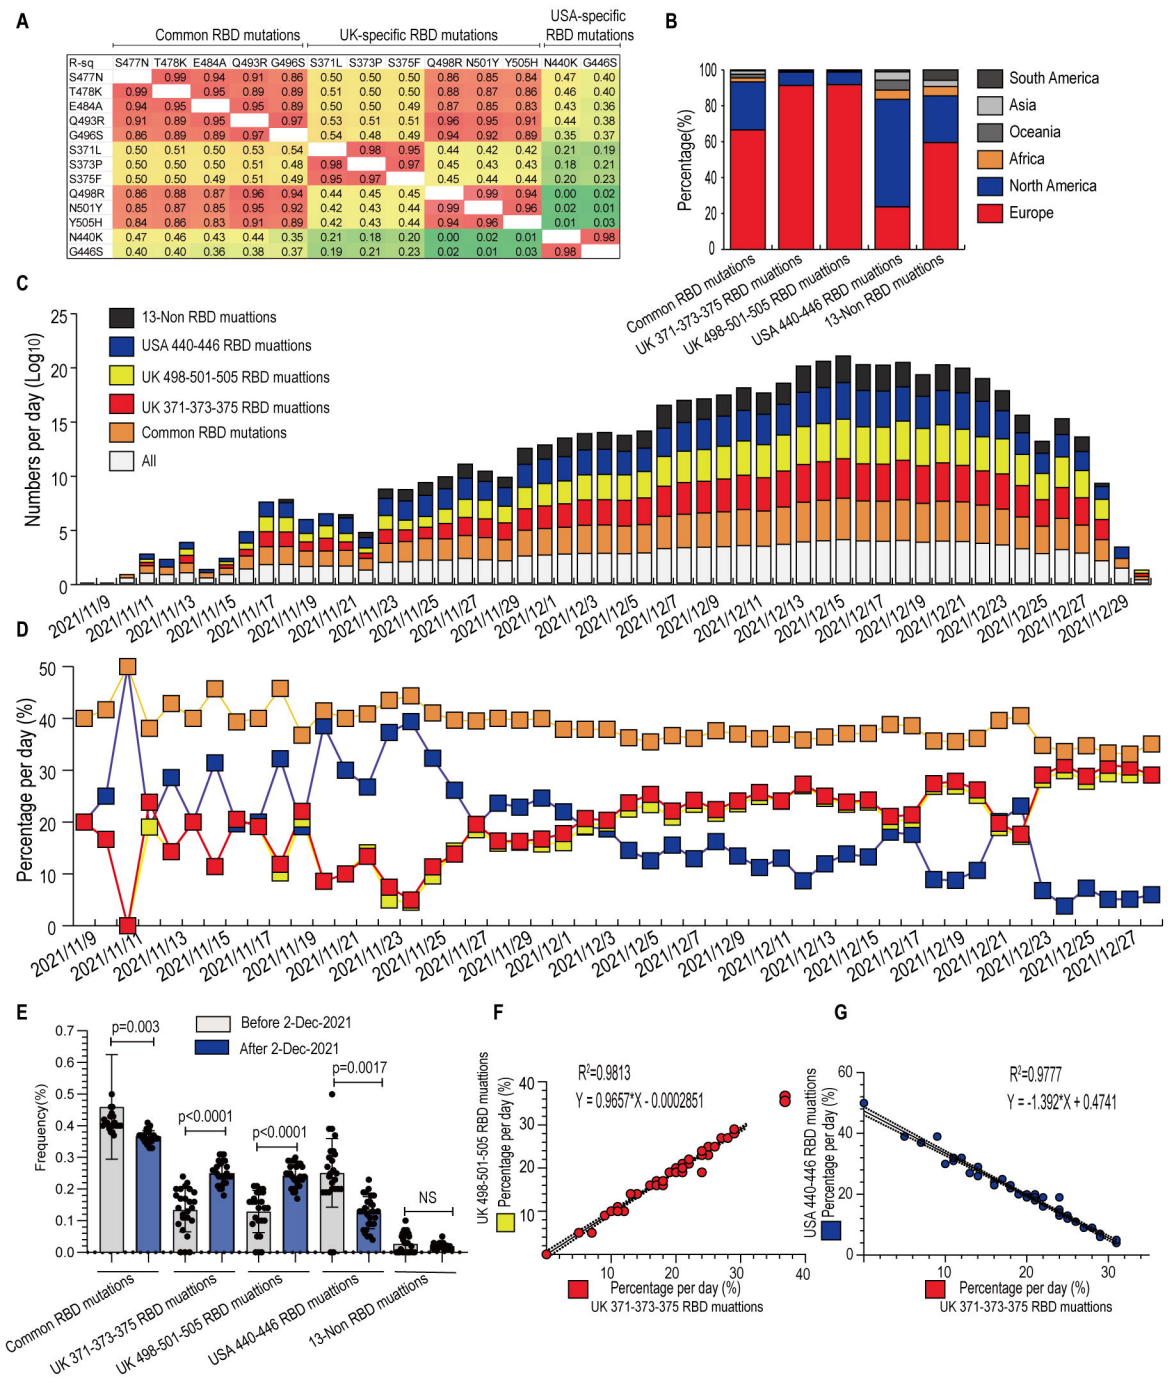

Source: http://medrxiv.org/content/10.1101/2022.01.19.22269510v1.full.pdf
